# Supplementary material for: Transcriptome changes in response to temperature in the fish pathogen Photobacterium damselae subsp. damselae: Clues to understand the emergence of disease outbreaks at increased seawater temperatures
Source: PLoS One. 2018 Dec 31;13(12):e0210118. doi: 10.1371/journal.pone.0210118 (PMC6312309; doi:10.1371/journal.pone.0210118)
Supplement: S5 Table — (XLSX) [file pone.0210118.s005.xlsx]

## Sheet: Hoja1
ORF	FC	Predicted function	Characterized homologues
VDA_000108	1.66095	kinase phosphorylase	n/a
VDA_000110	1.95258	putative toxin with a role in virulence	Vibrio vulnificus vep07 (36%id)	Roig FJ, Amaro 2009
VDA_000111	2.98221	TonB-dependent hemin ferrichrome receptor with a role in virulence	Vibrio vulnificus vep20 (60% id)	Pajuelo et al., 2015
VDA_000112	2.45457	h.p.	n/a
VDA_000113	2.47427	putative virulence factor porin OmpU	Vibrio tasmaniensis OmpU (30%id)	Duperthuy et al., 2010; 2011
VDA_000118	1.73338	outer membrane porin	n/a
VDA_000121	2.17247	h.p.	n/a
VDA_000138	1.64483	protein for plasmid conjugative trasfer, TraI	Vibrio tapetis TraI (40%id)	Erauso et al., 2011
VDA_000142	1.91515	DNA-binding protein for plasmid replication	n/a
VDA_000143	1.79154	DNA-binding protein H-NS for transcriptional regulation	Yersinia enterocolitica (57,8% id)	Baños, 2008
VDA_000144	1.86501	acetate/propionate kinase	n/a
VDA_000145	1.51053	protein that contains a domain of unknown function DUF2913	n/a
VDA_000154	2.42071	ATPase component of a tripartite pump for multidrug efflux and toxin secretion, MacB	E. coli MacB (52%id)	Kobayashi et al., 2001
VDA_000155	2.07583	permease component of a tripartite pump for multidrug efflux and toxin secretion	n/a
VDA_000156	2.40716	permease component of a tripartite pump for multidrug efflux and toxin secretion	n/a
VDA_000157	2.82269	outer membrane protein of a tripartite pump for multidrug efflux and toxin secretion, TolC	Vibrio vulnificus TolC (69%id)	Lee et al., 2013
VDA_000158	3.19041	membrane-fusion protein of a tripartite pump for multidrug efflux and toxin secretion, MacA	E. coli MacA (22%)	Modali & Zgurskaya, 2011
VDA_000160	1.59302	cytolysin and hemolysin HlyA Pore-forming toxin	well characterized in Pdd	Rivas et al., 2015b
A0J47_18110	2.76638	hypothetical protein involved in type VI secretion system	n/a
A0J47_18115	2.66773	RNase toxin with a putative role in virulence Ntox44	n/a
A0J47_18120	2.91854	PAAR domain-containing protein of the type VI secretion system	Vibrio cholerae PAAR protein (33%id)	Shneider et al., 2013
